# Supplementary material for: Detection of Anaplasma phagocytophilum, Babesia microti, Borrelia burgdorferi, Borrelia miyamotoi, and Powassan Virus in Ticks by a Multiplex Real-Time Reverse Transcription-PCR Assay
Source: PubMed Central journal article supplement (PMC5397568; doi:10.1128/msphere.00151-17), 2017-04-19

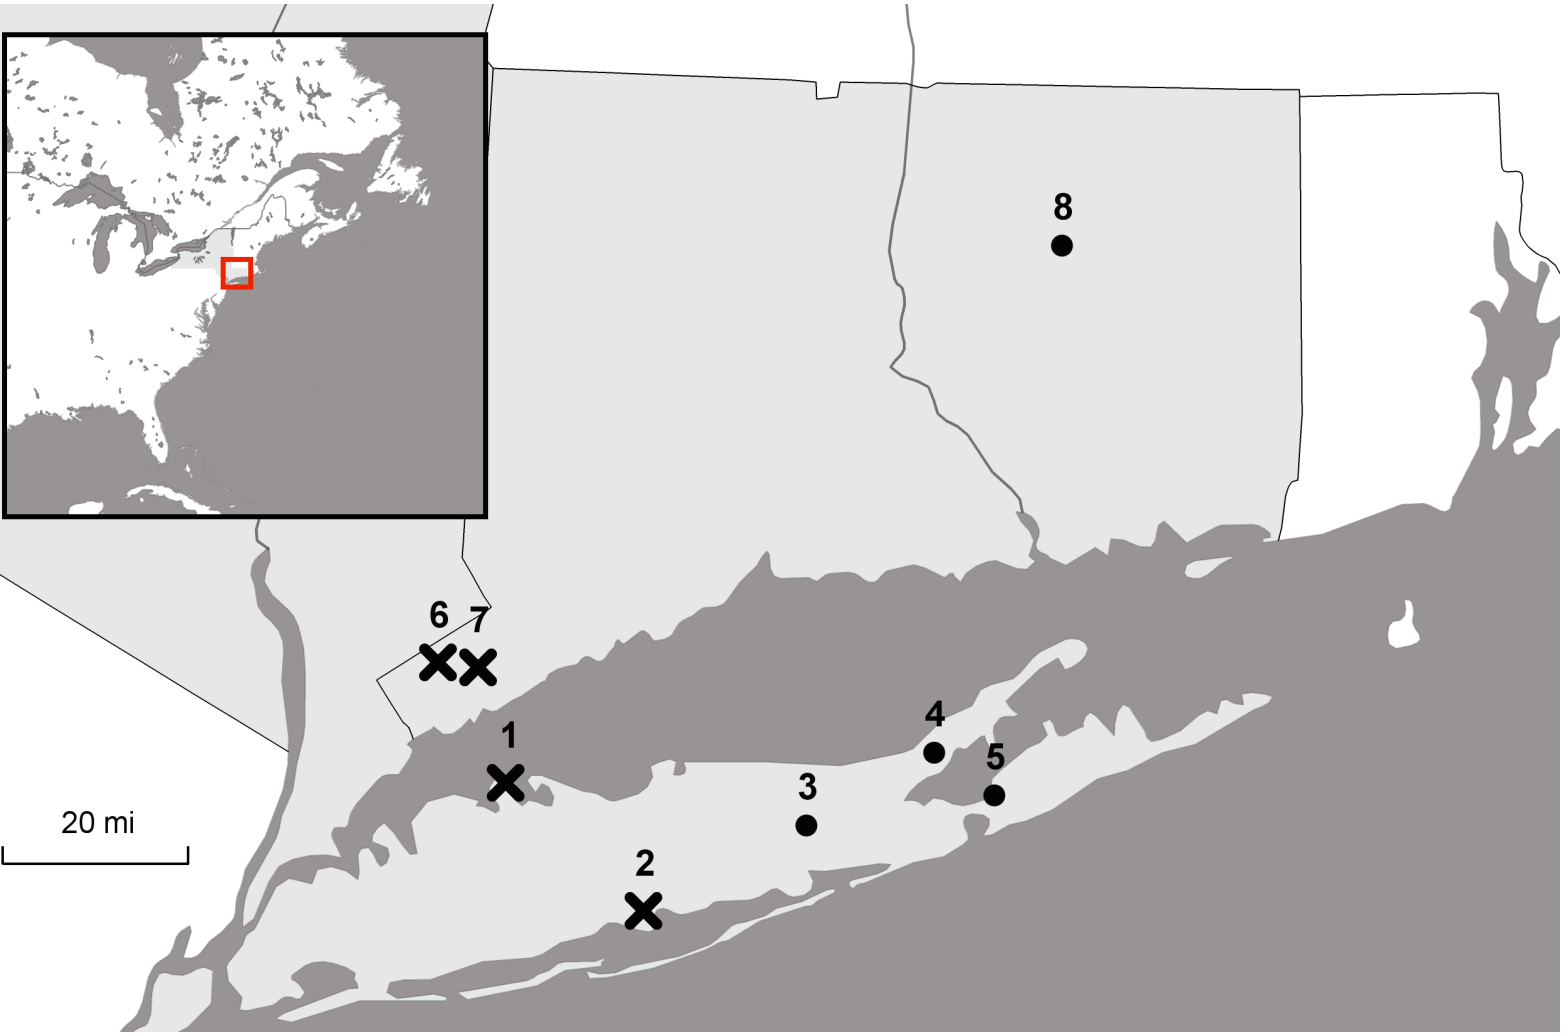

Supplement: sph002172269sf1.pdf [file sph002172269sf1.pdf]
