# Supplementary material for: Detection of Anaplasma phagocytophilum, Babesia microti, Borrelia burgdorferi, Borrelia miyamotoi, and Powassan Virus in Ticks by a Multiplex Real-Time Reverse Transcription-PCR Assay
Source: PubMed Central journal article supplement (PMC5397568; doi:10.1128/msphere.00151-17), 2017-04-19
Supplement: sph002172269st2.pdf [file sph002172269st2.pdf]

**Supplemental Table 1.** Multiplex assay sensitivity in detection of multiple agents

| 3 agents present          |                      | 4 agents present          |                      | 5 agents present          |                      |
|---------------------------|----------------------|---------------------------|----------------------|---------------------------|----------------------|
| Agent                     | Sensitivity (copies) | Agent                     | Sensitivity (copies) | Agent                     | Sensitivity (copies) |
| <i>A. phagocytophilum</i> | 10                   | <i>A. phagocytophilum</i> | 10                   | <i>A. phagocytophilum</i> | 10                   |
| <i>B. microti</i>         | 10                   | <i>B. microti</i>         | 10                   | <i>B. microti</i>         | 10                   |
| <i>B. burgdorferi</i>     | 10                   | <i>B. burgdorferi</i>     | 10                   | <i>B. burgdorferi</i>     | 10                   |
| <i>B. miyamotoi</i>       | 10                   | <i>B. miyamotoi</i>       | 10                   | <i>B. miyamotoi</i>       | 10                   |
| Powassan virus            | 10                   | Powassan virus            | 10                   | Powassan virus            | 20                   |

In assays with 3 and 4 standards, different combinations of agents were tested with equal sensitivity results.

Concentrations tested included 10, 20, 50, 100 and 1000 copies present at equal concentration for each agent.
